# Supplementary material for: Lipid Signaling via Pkh1/2 Regulates Fungal CO2 Sensing through the Kinase Sch9
Source: PubMed Central journal article supplement (PMC5263247; doi:10.1128/mbio.02211-16), 2017-01-31
Supplement: mbo001173162sf1.pdf [file mbo001173162sf1.pdf]

**A**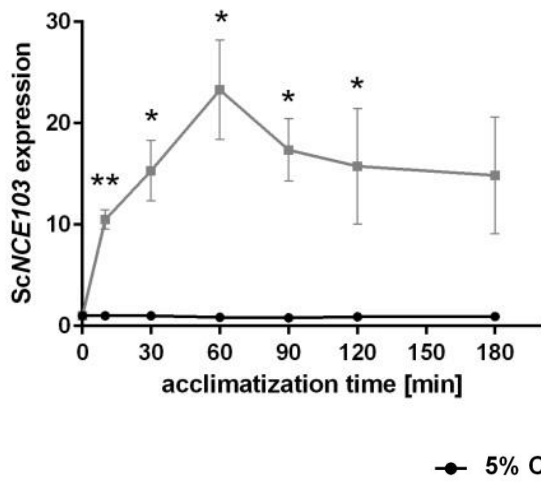**B**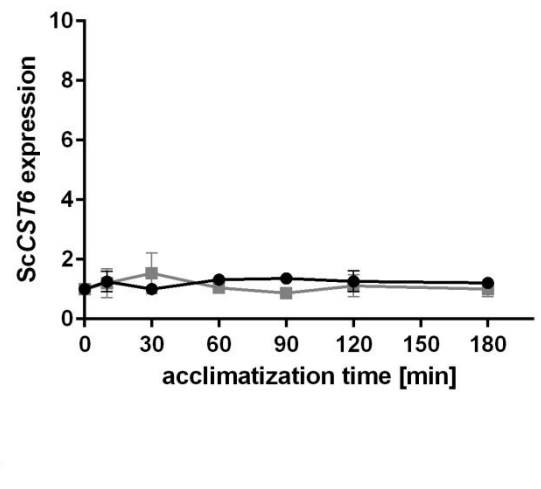

**Fig. S1 CO<sub>2</sub>-dependent time-course expression of ScNCE103 and ScCST6**
