# Supplementary material for: Lipid Signaling via Pkh1/2 Regulates Fungal CO2 Sensing through the Kinase Sch9
Source: PubMed Central journal article supplement (PMC5263247; doi:10.1128/mbio.02211-16), 2017-01-31
Supplement: mbo001173162sf2.pdf [file mbo001173162sf2.pdf]

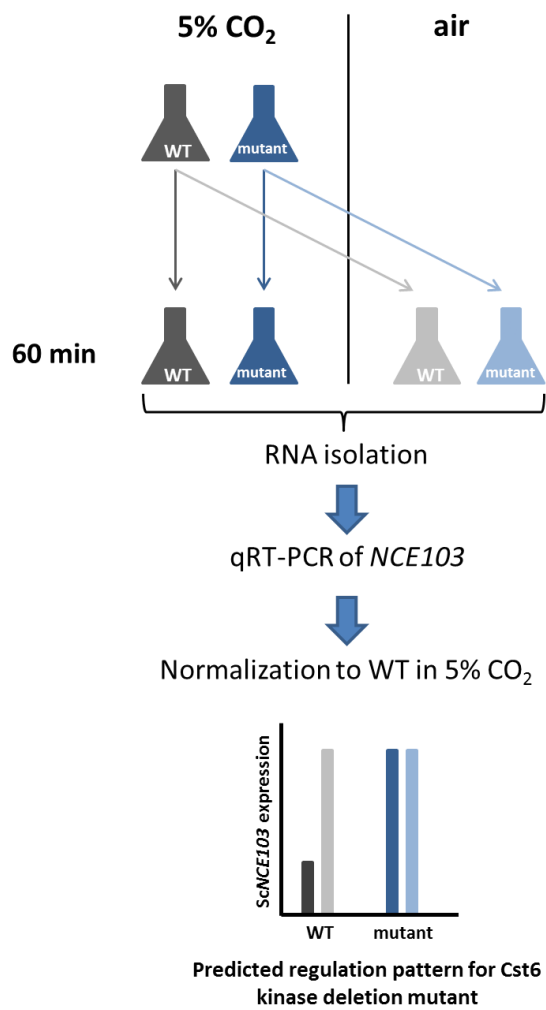

Fig. S2 Workflow of mutant library screening for Cst6 kinase identification
