# Supplementary material for: Lipid Signaling via Pkh1/2 Regulates Fungal CO2 Sensing through the Kinase Sch9
Source: PubMed Central journal article supplement (PMC5263247; doi:10.1128/mbio.02211-16), 2017-01-31
Supplement: mbo001173162sf3.pdf [file mbo001173162sf3.pdf]

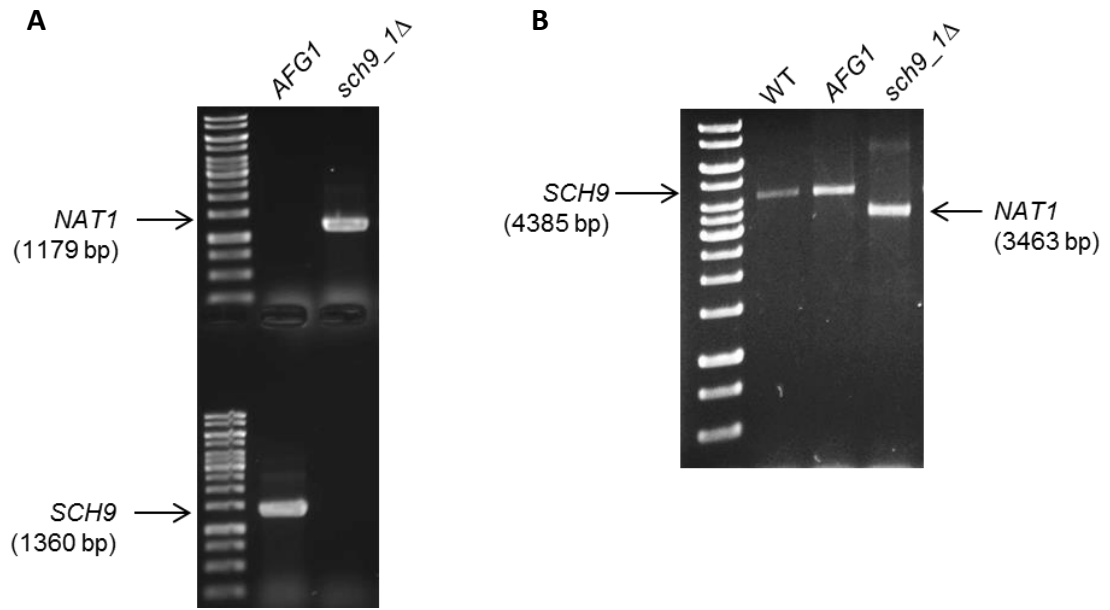

**Fig. S3 Verification of *C. glabrata* sch9<sup>Δ</sup> deletion**
