# Supplementary material for: Lipid Signaling via Pkh1/2 Regulates Fungal CO2 Sensing through the Kinase Sch9
Source: PubMed Central journal article supplement (PMC5263247; doi:10.1128/mbio.02211-16), 2017-01-31
Supplement: mbo001173162st1.pdf [file mbo001173162st1.pdf]

**Table S1: Strains, plasmids and primers used in the study**

| <b><i>S. cerevisiae</i> mutant library</b> |                 |                                                                     |                         |
|--------------------------------------------|-----------------|---------------------------------------------------------------------|-------------------------|
| <b>Name</b>                                | <b>Deletion</b> | <b>Genotype</b>                                                     | <b>Source/Reference</b> |
| wild type                                  | -               | BY4741, MAT a, his3Δ1; leu2Δ0;; met15Δ0; ura3Δ0                     | Euroscarf               |
| akl1Δ                                      | YBR059C         | BY4741, MAT a, his3Δ1; leu2Δ0;; met15Δ0; ura3Δ0;<br>YBR059c::kanMX4 | Euroscarf               |
| alk1Δ                                      | YGL021W         | BY4741, MAT a, his3Δ1; leu2Δ0;; met15Δ0; ura3Δ0;<br>YGL021w::kanMX4 | Euroscarf               |
| alk2Δ                                      | YBL009W         | BY4741, MAT a, his3Δ1; leu2Δ0;; met15Δ0; ura3Δ0;<br>YBL009w::kanMX4 | Euroscarf               |
| ark1Δ                                      | YNL020C         | BY4741, MAT a, his3Δ1; leu2Δ0;; met15Δ0; ura3Δ0;<br>YNL020c::kanMX4 | Euroscarf               |
| atg1Δ                                      | YGL180W         | BY4741, MAT a, his3Δ1; leu2Δ0;; met15Δ0; ura3Δ0;<br>YGL180w::kanMX4 | Euroscarf               |
| bck1Δ                                      | YJL095W         | BY4741, MAT a, his3Δ1; leu2Δ0;; met15Δ0; ura3Δ0;<br>YJL095w::kanMX4 | Euroscarf               |
| bub1Δ                                      | YGR188C         | BY4741, MAT a, his3Δ1; leu2Δ0;; met15Δ0; ura3Δ0;<br>YGR188c::kanMX4 | Euroscarf               |
| bud32Δ                                     | YGR262C         | BY4741, MAT a, his3Δ1; leu2Δ0;; met15Δ0; ura3Δ0;<br>YGR262c::kanMX4 | Euroscarf               |
| cdc55Δ                                     | YGL190C         | BY4741, MAT a, his3Δ1; leu2Δ0;; met15Δ0; ura3Δ0;<br>YGL190c::kanMX4 | Euroscarf               |
| chk1Δ                                      | YBR274W         | BY4741, MAT a, his3Δ1; leu2Δ0;; met15Δ0; ura3Δ0;<br>YBR274w::kanMX4 | Euroscarf               |
| cka1Δ                                      | YIL035C         | BY4741, MAT a, his3Δ1; leu2Δ0;; met15Δ0; ura3Δ0;<br>YIL035c::kanMX4 | Euroscarf               |
| cka2Δ                                      | YOR061W         | BY4741, MAT a, his3Δ1; leu2Δ0;; met15Δ0; ura3Δ0;<br>YOR061w::kanMX4 | Euroscarf               |
| cla4Δ                                      | YNL298W         | BY4741, MAT a, his3Δ1; leu2Δ0;; met15Δ0; ura3Δ0;<br>YNL298w::kanMX4 | Euroscarf               |
| cmk1Δ                                      | YFR014C         | BY4741, MAT a, his3Δ1; leu2Δ0;; met15Δ0; ura3Δ0;<br>YFR014c::kanMX4 | Euroscarf               |
| cmk2Δ                                      | YOL016C         | BY4741, MAT a, his3Δ1; leu2Δ0;; met15Δ0; ura3Δ0;<br>YOL016c::kanMX4 | Euroscarf               |
| cmp2Δ                                      | YML057W         | BY4741, MAT a, his3Δ1; leu2Δ0;; met15Δ0; ura3Δ0;<br>YML057w::kanMX4 | Euroscarf               |
| cna1Δ                                      | YLR433C         | BY4741, MAT a, his3Δ1; leu2Δ0;; met15Δ0; ura3Δ0;<br>YLR433c::kanMX4 | Euroscarf               |
| cnb1Δ                                      | YKL190W         | BY4741, MAT a, his3Δ1; leu2Δ0;; met15Δ0; ura3Δ0;<br>YKL190w::kanMX4 | Euroscarf               |
| cst6Δ                                      | YIL036W         | BY4741, Mat a; his3D1; leu2D0; met15D0; ura3D0;<br>YIL036w::kanMX4  | Euroscarf               |
| ctk1Δ                                      | YKL139W         | BY4741, MAT a, his3Δ1; leu2Δ0;; met15Δ0; ura3Δ0;<br>YKL139w::kanMX4 | Euroscarf               |
| ctk2Δ                                      | YJL006C         | BY4741, MAT a, his3Δ1; leu2Δ0;; met15Δ0; ura3Δ0;<br>YJL006c::kanMX4 | Euroscarf               |
| ctk3Δ                                      | YML112W         | BY4741, MAT a, his3Δ1; leu2Δ0;; met15Δ0; ura3Δ0;<br>YML112w::kanMX4 | Euroscarf               |
| dbf2Δ                                      | YGR092W         | BY4741, MAT a, his3Δ1; leu2Δ0;; met15Δ0; ura3Δ0;<br>YGR092w::kanMX4 | Euroscarf               |
| dbf20Δ                                     | YPR111W         | BY4742, MAT α, his3Δ1; leu2Δ0;; met15Δ0; ura3Δ0;<br>YPR111w::kanMX4 | Euroscarf               |
| dcr2Δ                                      | YLR361C         | BY4741, MAT a, his3Δ1; leu2Δ0;; met15Δ0; ura3Δ0;<br>YLR361c::kanMX4 | Euroscarf               |

|        |         |                                                                     |           |
|--------|---------|---------------------------------------------------------------------|-----------|
| dun1Δ  | YDL101C | BY4741, MAT a, his3Δ1; leu2Δ0;; met15Δ0; ura3Δ0;<br>YDL101c::kanMX4 | Euroscarf |
| elm1Δ  | YKL048C | BY4741, MAT a, his3Δ1; leu2Δ0;; met15Δ0; ura3Δ0;<br>YKL048c::kanMX4 | Euroscarf |
| env7Δ  | YPL236C | BY4741, MAT a, his3Δ1; leu2Δ0;; met15Δ0; ura3Δ0;<br>YPL236c::kanMX4 | Euroscarf |
| fpk1Δ  | YNR047W | BY4741, MAT a, his3Δ1; leu2Δ0;; met15Δ0; ura3Δ0;<br>YNR047w::kanMX4 | Euroscarf |
| frk1Δ  | YPL141C | BY4741, MAT a, his3Δ1; leu2Δ0;; met15Δ0; ura3Δ0;<br>YPL141c::kanMX4 | Euroscarf |
| fus3Δ  | YBL016W | BY4741, MAT a, his3Δ1; leu2Δ0;; met15Δ0; ura3Δ0;<br>YBL016w::kanMX4 | Euroscarf |
| gal83Δ | YER027C | BY4741, MAT a, his3Δ1; leu2Δ0;; met15Δ0; ura3Δ0;<br>YER027c::kanMX4 | Euroscarf |
| gcn2Δ  | YDR283C | BY4741, MAT a, his3Δ1; leu2Δ0;; met15Δ0; ura3Δ0;<br>YDR283c::kanMX4 | Euroscarf |
| gin4Δ  | YDR507C | BY4741, MAT a, his3Δ1; leu2Δ0;; met15Δ0; ura3Δ0;<br>YDR507c::kanMX4 | Euroscarf |
| gpa2Δ  | YER020W | BY4741, Mat a; his3D1; leu2D0; met15D0; ura3D0;<br>YER020w::kanMX4  | Euroscarf |
| hal5Δ  | YJL165C | BY4741, MAT a, his3Δ1; leu2Δ0;; met15Δ0; ura3Δ0;<br>YJL165c::kanMX4 | Euroscarf |
| hog1Δ  | YLR113W | BY4741, MAT a, his3Δ1; leu2Δ0;; met15Δ0; ura3Δ0;<br>YLR113w::kanMX4 | Euroscarf |
| hrk1Δ  | YOR267C | BY4741, MAT a, his3Δ1; leu2Δ0;; met15Δ0; ura3Δ0;<br>YOR267c::kanMX4 | Euroscarf |
| hsl1Δ  | YKL101W | BY4741, MAT a, his3Δ1; leu2Δ0;; met15Δ0; ura3Δ0;<br>YKL101w::kanMX4 | Euroscarf |
| ime2Δ  | YJL106W | BY4741, MAT a, his3Δ1; leu2Δ0;; met15Δ0; ura3Δ0;<br>YJL106w::kanMX4 | Euroscarf |
| ire1Δ  | YHR079C | BY4741, MAT a, his3Δ1; leu2Δ0;; met15Δ0; ura3Δ0;<br>YHR079c::kanMX4 | Euroscarf |
| isr1Δ  | YPR106W | BY4741, MAT a, his3Δ1; leu2Δ0;; met15Δ0; ura3Δ0;<br>YPR106w::kanMX4 | Euroscarf |
| kcc4Δ  | YCL024W | BY4741, MAT a, his3Δ1; leu2Δ0;; met15Δ0; ura3Δ0;<br>YCL024w::kanMX4 | Euroscarf |
| kdx1Δ  | YKL161C | BY4741, MAT a, his3Δ1; leu2Δ0;; met15Δ0; ura3Δ0;<br>YKL161c::kanMX4 | Euroscarf |
| kin1Δ  | YDR122W | BY4741, MAT a, his3Δ1; leu2Δ0;; met15Δ0; ura3Δ0;<br>YDR122w::kanMX4 | Euroscarf |
| kin2Δ  | YLR096W | BY4741, MAT a, his3Δ1; leu2Δ0;; met15Δ0; ura3Δ0;<br>YLR096w::kanMX4 | Euroscarf |
| kin3Δ  | YAR018C | BY4741, MAT a, his3Δ1; leu2Δ0;; met15Δ0; ura3Δ0;<br>YAL018c::kanMX4 | Euroscarf |
| kin4Δ  | YOR233W | BY4741, MAT a, his3Δ1; leu2Δ0;; met15Δ0; ura3Δ0;<br>YOR233w::kanMX4 | Euroscarf |
| kin82Δ | YCR091W | BY4741, MAT a, his3Δ1; leu2Δ0;; met15Δ0; ura3Δ0;<br>YCR091w::kanMX4 | Euroscarf |
| kkq8Δ  | YKL168C | BY4741, MAT a, his3Δ1; leu2Δ0;; met15Δ0; ura3Δ0;<br>YKL168c::kanMX4 | Euroscarf |
| kns1Δ  | YLL019C | BY4741, MAT a, his3Δ1; leu2Δ0;; met15Δ0; ura3Δ0;<br>YLL019c::kanMX4 | Euroscarf |
| ksp1Δ  | YHR082C | BY4741, MAT a, his3Δ1; leu2Δ0;; met15Δ0; ura3Δ0;<br>YHR082c::kanMX4 | Euroscarf |
| kss1Δ  | YGR040W | BY4741, MAT a, his3Δ1; leu2Δ0;; met15Δ0; ura3Δ0;<br>YGR040w::kanMX4 | Euroscarf |

|        |         |                                                                     |           |
|--------|---------|---------------------------------------------------------------------|-----------|
| lcb5Δ  | YLR260W | BY4741, MAT a, his3Δ1; leu2Δ0;; met15Δ0; ura3Δ0;<br>YLR260w::kanMX4 | Euroscarf |
| ltp1Δ  | YPR073C | BY4741, MAT a, his3Δ1; leu2Δ0;; met15Δ0; ura3Δ0;<br>YPR073c::kanMX4 | Euroscarf |
| mck1Δ  | YNL307C | BY4741, MAT a, his3Δ1; leu2Δ0;; met15Δ0; ura3Δ0;<br>YNL307c::kanMX4 | Euroscarf |
| mek1Δ  | YOR351C | BY4741, MAT a, his3Δ1; leu2Δ0;; met15Δ0; ura3Δ0;<br>YOR351c::kanMX4 | Euroscarf |
| mih1Δ  | YMR036C | BY4741, MAT a, his3Δ1; leu2Δ0;; met15Δ0; ura3Δ0;<br>YMR036c::kanMX4 | Euroscarf |
| mkk1Δ  | YOR231W | BY4741, MAT a, his3Δ1; leu2Δ0;; met15Δ0; ura3Δ0;<br>YOR231w::kanMX4 | Euroscarf |
| mkk2Δ  | YPL140C | BY4741, MAT a, his3Δ1; leu2Δ0;; met15Δ0; ura3Δ0;<br>YPL140c::kanMX4 | Euroscarf |
| mrk1Δ  | YDL079C | BY4741, MAT a, his3Δ1; leu2Δ0;; met15Δ0; ura3Δ0;<br>YDL079c::kanMX4 | Euroscarf |
| msg5Δ  | YNL053W | BY4741, MAT a, his3Δ1; leu2Δ0;; met15Δ0; ura3Δ0;<br>YNL053w::kanMX4 | Euroscarf |
| nem1Δ  | YHR004C | BY4741, MAT a, his3Δ1; leu2Δ0;; met15Δ0; ura3Δ0;<br>YHR004c::kanMX4 | Euroscarf |
| nnk1Δ  | YKL171W | BY4741, MAT a, his3Δ1; leu2Δ0;; met15Δ0; ura3Δ0;<br>YKL171w::kanMX4 | Euroscarf |
| npr1Δ  | YNL183C | BY4741, MAT a, his3Δ1; leu2Δ0;; met15Δ0; ura3Δ0;<br>YNL183c::kanMX4 | Euroscarf |
| oca1Δ  | YNL099C | BY4741, MAT a, his3Δ1; leu2Δ0;; met15Δ0; ura3Δ0;<br>YNL099c::kanMX4 | Euroscarf |
| pbs2Δ  | YJL128C | BY4741, MAT a, his3Δ1; leu2Δ0;; met15Δ0; ura3Δ0;<br>YJL128c::kanMX4 | Euroscarf |
| pho13Δ | YDL236W | BY4741, MAT a, his3Δ1; leu2Δ0;; met15Δ0; ura3Δ0;<br>YDL236w::kanMX4 | Euroscarf |
| pho85Δ | YPL031C | BY4741, MAT a, his3Δ1; leu2Δ0;; met15Δ0; ura3Δ0;<br>YPL031c::kanMX4 | Euroscarf |
| pkh1Δ  | YDR490C | BY4741, MAT a, his3Δ1; leu2Δ0;; met15Δ0; ura3Δ0;<br>YDR490c::kanMX4 | Euroscarf |
| pkh2Δ  | YOL100W | BY4741, MAT a, his3Δ1; leu2Δ0;; met15Δ0; ura3Δ0;<br>YOL100w::kanMX4 | Euroscarf |
| pkh3Δ  | YDR466W | BY4741, MAT a, his3Δ1; leu2Δ0;; met15Δ0; ura3Δ0;<br>YDR466w::kanMX4 | Euroscarf |
| pkp1Δ  | YIL042C | BY4741, MAT a, his3Δ1; leu2Δ0;; met15Δ0; ura3Δ0;<br>YIL042c::kanMX4 | Euroscarf |
| pkp2Δ  | YGL059W | BY4741, MAT a, his3Δ1; leu2Δ0;; met15Δ0; ura3Δ0;<br>YGL059w::kanMX4 | Euroscarf |
| ppg1Δ  | YNR032W | BY4741, MAT a, his3Δ1; leu2Δ0;; met15Δ0; ura3Δ0;<br>YNR032w::kanMX4 | Euroscarf |
| pph21Δ | YDL134C | BY4741, MAT a, his3Δ1; leu2Δ0;; met15Δ0; ura3Δ0;<br>YDL134c::kanMX4 | Euroscarf |
| pph22Δ | YDL188C | BY4741, MAT a, his3Δ1; leu2Δ0;; met15Δ0; ura3Δ0;<br>YDL188c::kanMX4 | Euroscarf |
| pph3Δ  | YDR075W | BY4741, MAT a, his3Δ1; leu2Δ0;; met15Δ0; ura3Δ0;<br>YDR075w::kanMX4 | Euroscarf |
| ppq1Δ  | YPL179W | BY4741, MAT a, his3Δ1; leu2Δ0;; met15Δ0; ura3Δ0;<br>YPL179w::kanMX4 | Euroscarf |
| pps1Δ  | YBR276C | BY4741, MAT a, his3Δ1; leu2Δ0;; met15Δ0; ura3Δ0;<br>YBR276c::kanMX4 | Euroscarf |
| ppt1Δ  | YGR123C | BY4741, MAT a, his3Δ1; leu2Δ0;; met15Δ0; ura3Δ0;<br>YGR123c::kanMX4 | Euroscarf |

|        |         |                                                                     |           |
|--------|---------|---------------------------------------------------------------------|-----------|
| ppz1Δ  | YML016C | BY4741, MAT a, his3Δ1; leu2Δ0;; met15Δ0; ura3Δ0;<br>YML016c::kanMX4 | Euroscarf |
| ppz2Δ  | YDR436W | BY4741, MAT a, his3Δ1; leu2Δ0;; met15Δ0; ura3Δ0;<br>YDR436w::kanMX4 | Euroscarf |
| prk1Δ  | YIL095W | BY4741, MAT a, his3Δ1; leu2Δ0;; met15Δ0; ura3Δ0;<br>YIL095w::kanMX4 | Euroscarf |
| prr1Δ  | YKL116C | BY4741, MAT a, his3Δ1; leu2Δ0;; met15Δ0; ura3Δ0;<br>YKL116c::kanMX4 | Euroscarf |
| prr2Δ  | YDL214C | BY4741, MAT a, his3Δ1; leu2Δ0;; met15Δ0; ura3Δ0;<br>YDL214c::kanMX4 | Euroscarf |
| psk1Δ  | YAL017W | BY4741, MAT a, his3Δ1; leu2Δ0;; met15Δ0; ura3Δ0;<br>YAL017w::kanMX4 | Euroscarf |
| psk2Δ  | YOL045W | BY4741, MAT a, his3Δ1; leu2Δ0;; met15Δ0; ura3Δ0;<br>YOL045w::kanMX4 | Euroscarf |
| psr1Δ  | YLL010C | BY4741, MAT a, his3Δ1; leu2Δ0;; met15Δ0; ura3Δ0;<br>YLL010c::kanMX4 | Euroscarf |
| psr2Δ  | YLR019W | BY4741, MAT a, his3Δ1; leu2Δ0;; met15Δ0; ura3Δ0;<br>YLR019w::kanMX4 | Euroscarf |
| ptc1Δ  | YDL006W | BY4741, MAT a, his3Δ1; leu2Δ0;; met15Δ0; ura3Δ0;<br>YDL006w::kanMX4 | Euroscarf |
| ptc2Δ  | YER089C | BY4741, MAT a, his3Δ1; leu2Δ0;; met15Δ0; ura3Δ0;<br>YER089c::kanMX4 | Euroscarf |
| ptc3Δ  | YBL056W | BY4741, MAT a, his3Δ1; leu2Δ0;; met15Δ0; ura3Δ0;<br>YBL056w::kanMX4 | Euroscarf |
| ptc4Δ  | YBR125C | BY4741, MAT a, his3Δ1; leu2Δ0;; met15Δ0; ura3Δ0;<br>YBR125c::kanMX4 | Euroscarf |
| ptc5Δ  | YOR090C | BY4741, MAT a, his3Δ1; leu2Δ0;; met15Δ0; ura3Δ0;<br>YOR090c::kanMX4 | Euroscarf |
| ptc6Δ  | YCR079W | BY4741, MAT a, his3Δ1; leu2Δ0;; met15Δ0; ura3Δ0;<br>YCR079w::kanMX4 | Euroscarf |
| ptc7Δ  | YHR076W | BY4741, MAT a, his3Δ1; leu2Δ0;; met15Δ0; ura3Δ0;<br>YHR076w::kanMX4 | Euroscarf |
| ptk1Δ  | YKL198C | BY4741, MAT a, his3Δ1; leu2Δ0;; met15Δ0; ura3Δ0;<br>YKL198c::kanMX4 | Euroscarf |
| ptk2Δ  | YJR059W | BY4741, MAT a, his3Δ1; leu2Δ0;; met15Δ0; ura3Δ0;<br>YJR059w::kanMX4 | Euroscarf |
| ptp1Δ  | YDL230W | BY4741, MAT a, his3Δ1; leu2Δ0;; met15Δ0; ura3Δ0;<br>YDL230w::kanMX4 | Euroscarf |
| ptp2Δ  | YOR208W | BY4741, MAT a, his3Δ1; leu2Δ0;; met15Δ0; ura3Δ0;<br>YOR208w::kanMX4 | Euroscarf |
| ptp3Δ  | YER075C | BY4741, MAT a, his3Δ1; leu2Δ0;; met15Δ0; ura3Δ0;<br>YER075c::kanMX4 | Euroscarf |
| rck1Δ  | YGL158W | BY4741, MAT a, his3Δ1; leu2Δ0;; met15Δ0; ura3Δ0;<br>YGL158w::kanMX4 | Euroscarf |
| rck2Δ  | YLR248W | BY4741, MAT a, his3Δ1; leu2Δ0;; met15Δ0; ura3Δ0;<br>YLR248w::kanMX4 | Euroscarf |
| rim11Δ | YMR139W | BY4741, MAT a, his3Δ1; leu2Δ0;; met15Δ0; ura3Δ0;<br>YMR139w::kanMX4 | Euroscarf |
| rim15Δ | YFL033C | BY4741, MAT a, his3Δ1; leu2Δ0;; met15Δ0; ura3Δ0;<br>YFL033c::kanMX4 | Euroscarf |
| rtk1Δ  | YDL025C | BY4741, MAT a, his3Δ1; leu2Δ0;; met15Δ0; ura3Δ0;<br>YDL025c::kanMX4 | Euroscarf |
| rtr1Δ  | YER139C | BY4741, MAT a, his3Δ1; leu2Δ0;; met15Δ0; ura3Δ0;<br>YER139c::kanMX4 | Euroscarf |
| rts1Δ  | YOR014W | BY4741, MAT a, his3Δ1; leu2Δ0;; met15Δ0; ura3Δ0;<br>YOR014w::kanMX4 | Euroscarf |

|         |         |                                                                     |           |
|---------|---------|---------------------------------------------------------------------|-----------|
| sak1Δ   | YER129W | BY4741, MAT a, his3Δ1; leu2Δ0;; met15Δ0; ura3Δ0;<br>YER129w::kanMX4 | Euroscarf |
| sap155Δ | YFR040W | BY4741, MAT a, his3Δ1; leu2Δ0;; met15Δ0; ura3Δ0;<br>YFR040w::kanMX4 | Euroscarf |
| sap185Δ | YJL098W | BY4741, MAT a, his3Δ1; leu2Δ0;; met15Δ0; ura3Δ0;<br>YJL098w::kanMX4 | Euroscarf |
| sap4Δ   | YGL229C | BY4741, MAT a, his3Δ1; leu2Δ0;; met15Δ0; ura3Δ0;<br>YGL229c::kanMX4 | Euroscarf |
| sat4Δ   | YCR008W | BY4741, MAT a, his3Δ1; leu2Δ0;; met15Δ0; ura3Δ0;<br>YCR008w::kanMX4 | Euroscarf |
| sch9Δ   | YHR205W | BY4741, MAT a, his3Δ1; leu2Δ0;; met15Δ0; ura3Δ0;<br>YHR205w::kanMX4 | Euroscarf |
| sdp1Δ   | YIL113W | BY4741, MAT a, his3Δ1; leu2Δ0;; met15Δ0; ura3Δ0;<br>YIL113w::kanMX4 | Euroscarf |
| sip1Δ   | YDR422C | BY4741, MAT a, his3Δ1; leu2Δ0;; met15Δ0; ura3Δ0;<br>YDR422c::kanMX4 | Euroscarf |
| sip2Δ   | YGL208W | BY4741, MAT a, his3Δ1; leu2Δ0;; met15Δ0; ura3Δ0;<br>YGL208w::kanMX4 | Euroscarf |
| siw14Δ  | YNL032W | BY4741, MAT a, his3Δ1; leu2Δ0;; met15Δ0; ura3Δ0;<br>YNL032w::kanMX4 | Euroscarf |
| skm1Δ   | YOL113W | BY4741, MAT a, his3Δ1; leu2Δ0;; met15Δ0; ura3Δ0;<br>YOL113w::kanMX4 | Euroscarf |
| sks1Δ   | YPL026C | BY4741, MAT a, his3Δ1; leu2Δ0;; met15Δ0; ura3Δ0;<br>YPL026c::kanMX4 | Euroscarf |
| sky1Δ   | YMR216C | BY4741, MAT a, his3Δ1; leu2Δ0;; met15Δ0; ura3Δ0;<br>YMR216c::kanMX4 | Euroscarf |
| slt2Δ   | YHR030C | BY4741, MAT a, his3Δ1; leu2Δ0;; met15Δ0; ura3Δ0;<br>YHR030c::kanMX4 | Euroscarf |
| smk1Δ   | YPR054W | BY4741, MAT a, his3Δ1; leu2Δ0;; met15Δ0; ura3Δ0;<br>YPR054w::kanMX4 | Euroscarf |
| snf1Δ   | YDR477W | BY4742, MAT α, his3Δ1; leu2Δ0;; met15Δ0; ura3Δ0;<br>YDR477w::kanMX4 | Euroscarf |
| snf4Δ   | YGL115W | BY4741, MAT a, his3Δ1; leu2Δ0;; met15Δ0; ura3Δ0;<br>YGL115w::kanMX4 | Euroscarf |
| spo7Δ   | YAL009W | BY4741, MAT a, his3Δ1; leu2Δ0;; met15Δ0; ura3Δ0;<br>YAL009w::kanMX4 | Euroscarf |
| ssk2Δ   | YNR031C | BY4741, MAT a, his3Δ1; leu2Δ0;; met15Δ0; ura3Δ0;<br>YNR031c::kanMX4 | Euroscarf |
| ssk22Δ  | YCR073C | BY4741, MAT a, his3Δ1; leu2Δ0;; met15Δ0; ura3Δ0;<br>YCR073c::kanMX4 | Euroscarf |
| ssn3Δ   | YPL042C | BY4741, MAT a, his3Δ1; leu2Δ0;; met15Δ0; ura3Δ0;<br>YPL042c::kanMX4 | Euroscarf |
| ste11Δ  | YLR362W | BY4741, MAT a, his3Δ1; leu2Δ0;; met15Δ0; ura3Δ0;<br>YLR362w::kanMX4 | Euroscarf |
| ste20Δ  | YHL007C | BY4741, MAT a, his3Δ1; leu2Δ0;; met15Δ0; ura3Δ0;<br>YHL007c::kanMX4 | Euroscarf |
| ste7Δ   | YDL159W | BY4741, MAT a, his3Δ1; leu2Δ0;; met15Δ0; ura3Δ0;<br>YDL159w::kanMX4 | Euroscarf |
| swe1Δ   | YJL187C | BY4741, MAT a, his3Δ1; leu2Δ0;; met15Δ0; ura3Δ0;<br>YJL187c::kanMX4 | Euroscarf |
| tda1Δ   | YMR291W | BY4741, MAT a, his3Δ1; leu2Δ0;; met15Δ0; ura3Δ0;<br>YMR291w::kanMX4 | Euroscarf |
| tel1Δ   | YBL088C | BY4741, MAT a, his3Δ1; leu2Δ0;; met15Δ0; ura3Δ0;<br>YBL088c::kanMX4 | Euroscarf |
| tor1Δ   | YJR066W | BY4741, MAT a, his3Δ1; leu2Δ0;; met15Δ0; ura3Δ0;<br>YJR066w::kanMX4 | Euroscarf |

|          |         |                                                                  |           |
|----------|---------|------------------------------------------------------------------|-----------|
| tos3Δ    | YGL179C | BY4741, MAT a, his3Δ1; leu2Δ0;; met15Δ0; ura3Δ0; YGL179c::kanMX4 | Euroscarf |
| tpd3Δ    | YAL016W | BY4741, MAT a, his3Δ1; leu2Δ0;; met15Δ0; ura3Δ0; YAL016w::kanMX4 | Euroscarf |
| tpk1Δ    | YJL164C | BY4741, MAT a, his3Δ1; leu2Δ0;; met15Δ0; ura3Δ0; YJL164c::kanMX4 | Euroscarf |
| tpk2Δ    | YPL203W | BY4741, MAT a, his3Δ1; leu2Δ0;; met15Δ0; ura3Δ0; YPL203w::kanMX4 | Euroscarf |
| tpk3Δ    | YKL166C | BY4741, MAT a, his3Δ1; leu2Δ0;; met15Δ0; ura3Δ0; YKL166c::kanMX4 | Euroscarf |
| vhs1Δ    | YDR247W | BY4741, MAT a, his3Δ1; leu2Δ0;; met15Δ0; ura3Δ0; YDR247w::kanMX4 | Euroscarf |
| yak1Δ    | YJL141C | BY4741, MAT a, his3Δ1; leu2Δ0;; met15Δ0; ura3Δ0; YJL141c::kanMX4 | Euroscarf |
| yeh1Δ    | YGR203W | BY4741, MAT a, his3Δ1; leu2Δ0;; met15Δ0; ura3Δ0; YGR203w::kanMX4 | Euroscarf |
| yck1Δ    | YHR135C | BY4741, MAT a, his3Δ1; leu2Δ0;; met15Δ0; ura3Δ0; YHR135c::kanMX4 | Euroscarf |
| yck2Δ    | YNL154C | BY4741, MAT a, his3Δ1; leu2Δ0;; met15Δ0; ura3Δ0; YNL154c::kanMX4 | Euroscarf |
| yck3Δ    | YER123W | BY4741, MAT a, his3Δ1; leu2Δ0;; met15Δ0; ura3Δ0; YER123w::kanMX4 | Euroscarf |
| ygk3Δ    | YOL128C | BY4741, MAT a, his3Δ1; leu2Δ0;; met15Δ0; ura3Δ0; YOL128c::kanMX4 | Euroscarf |
| ypk1Δ    | YKL126W | BY4741, MAT a, his3Δ1; leu2Δ0;; met15Δ0; ura3Δ0; YKL126w::kanMX4 | Euroscarf |
| ypk2Δ    | YMR104C | BY4741, MAT a, his3Δ1; leu2Δ0;; met15Δ0; ura3Δ0; YMR104c::kanMX4 | Euroscarf |
| ypk3Δ    | YBR028C | BY4741, MAT a, his3Δ1; leu2Δ0;; met15Δ0; ura3Δ0; YBR028c::kanMX4 | Euroscarf |
| YPL150WΔ | YPL150W | BY4741, MAT a, his3Δ1; leu2Δ0;; met15Δ0; ura3Δ0; YPL150w::kanMX4 | Euroscarf |
| yvh1Δ    | YIR026C | BY4741, MAT a, his3Δ1; leu2Δ0;; met15Δ0; ura3Δ0; YIR026c::kanMX4 | Euroscarf |

### other *S. cerevisiae* strains

| Name                    | Deletion | Genotype                                                    | Source/Reference |
|-------------------------|----------|-------------------------------------------------------------|------------------|
| BY4741 + SCH9-His       | -        | BY4741 + pRS316-promScGAL1-ScSch9-His (URA3 positive)       | this study       |
| BY4741 + promNCE103-GFP | -        | BY4741 + pRS316-pScNCE103GFP (URA3 positive)                | this study       |
| sch9Δ + promNCE103-GFP  | YHR205W  | YHR205WΔ + pRS316-pScNCE103GFP (URA3 positive)              | this study       |
| cst6Δ + promNCE103-GFP  | YIL036W  | YIL036WΔ + pRS316-pScNCE103GFP (URA3 positive)              | this study       |
| cst6Δ + CST6            | YIL036W  | YIL036WΔ + pRS316-promScCST6-ScCST6-His (URA3 positive)     | this study       |
| cst6Δ + CST6 (S266A)    | YIL036W  | YIL036WΔ + pRS316-promScCST6-ScCST6 (S266A) (URA3 positive) | this study       |
| cst6Δ + CST6 (S266D)    | YIL036W  | YIL036WΔ + pRS316-promScCST6-ScCST6 (S266D) (URA3 positive) | this study       |
| sch9Δ + SCH9            | YHR205W  | YHR205WΔ + pRS416-promScSCH9-ScSCH9-3HA (URA3 positive)     | this study       |

|                          |         |                                                                                                           |                                         |
|--------------------------|---------|-----------------------------------------------------------------------------------------------------------|-----------------------------------------|
| sch9Δ + SCH9 (T570A)     | YHR205W | YHR205WΔ + pRS416-promScSCH9-ScSCH9-3HA (T570A) (URA3 positive)                                           | this study                              |
| sch9Δ + SCH9 (6A)        | YHR205W | YHR205WΔ + pRS416-promScSCH9-ScSCH9-3HA (S711A, T723A, S726A, T737A, S758A, S765A) (URA3 positive)        | this study                              |
| sch9Δ + SCH9 (T570A, 6A) | YHR205W | YHR205WΔ + pRS416-promScSCH9-ScSCH9-3HA (T570A, S711A, T723A, S726A, T737A, S758A, S765A) (URA3 positive) | this study                              |
| 15 Dau                   | -       | <i>MATa leu2 ura3 trp1 his2 ade1</i>                                                                      | P. Van Dijck / Inagaki et al., 1999 (1) |
| pkh1 <sup>ts</sup> pkh2Δ | YOL100W | 15 Dau <i>pkh1::PKH1D398G pkh2::LEU2</i>                                                                  | P. Van Dijck / Inagaki et al., 1999 (1) |

### **C. glabrata strains**

| Name      | Deletion   | Genotype                                    | Source/Reference                           |
|-----------|------------|---------------------------------------------|--------------------------------------------|
| ATCC 2001 | -          | wild type                                   | F. Mühlischlegel / Kitada et al., 1995 (2) |
| rca1Δ     | RCA1       | ATCC 2001, <i>rca1Δ::TRP1, trp1, Δ ura3</i> | F. Mühlischlegel / Cottier et al., 2013    |
| AFG1      | LIG4       | <i>lig4::HIS1, trp1Δ</i> isolate A          | P. Van Dijck / Cen et al., 2015            |
| sch9Δ     | LIG4, SCH9 | <i>lig4::HIS1, trp1Δ, sch9::NAT1</i>        | this study                                 |

### **C. albicans strains**

| Name   | Deletion | Genotype                                                                                                       | Source/Reference                     |
|--------|----------|----------------------------------------------------------------------------------------------------------------|--------------------------------------|
| SC5314 | -        | wild type                                                                                                      | B. Hube                              |
| rca1ΔY | RCA1     | <i>leu2Δ/leu2Δ his1Δ/his1Δ arg4Δ/arg4Δ URA3/ura3Δ::imm434 IRO1/iro1Δ::imm434 rca1::LEU2/rca1::HIS1</i> clone Y | B. Hube                              |
| sch9Δ  | SCH9     | CAI4, <i>sch9Δ</i>                                                                                             | J. Ernst / Stichternoth et al., 2011 |

### **E. coli strains**

| Name    | Genotype                                                                                                                                    | Source/Reference         |
|---------|---------------------------------------------------------------------------------------------------------------------------------------------|--------------------------|
| BL21DE3 | <i>fhuA2 [lon] ompT gal (λ DE3) [dcm] ΔhsdS, λ DE3 = λ sBamHlo ΔEcoRI-B int::(lacI::PlacUV5::T7 gene1) i21 Δnin5</i>                        | New England Biolabs      |
| C2523H  | <i>fhuA2 [lon] ompT gal sulA11 R(mcr-73::miniTn10--Tet<sup>S</sup>)2 [dcm] R(zgb-210::Tn10--Tet<sup>S</sup>) endA1 Δ(mcrC-mrr)114::IS10</i> | New England Biolabs      |
| Rosetta | F <sup>-</sup> <i>ompT hsdS<sub>B</sub>(r<sub>B</sub><sup>-</sup> m<sub>B</sub><sup>-</sup>) gal dcm (DE3) pRARE (Cam<sup>R</sup>)</i>      | Novagen, Merck Millipore |

### **Plasmids**

| Name                         | Source/Reference |
|------------------------------|------------------|
| p41-ScNce103-His             | this study       |
| p41-ScCst6-His               | this study       |
| p41-ScSch9-His               | this study       |
| pRS316-promScGAL1-ScCST6-His | this study       |
| pRS316-promScGAL1-ScSch9-His | this study       |
| pRS316-pScNCE103+GFP         | this study       |
| pRS316-promScCST6-ScCST6-His | this study       |

|                                                                                |                                                  |
|--------------------------------------------------------------------------------|--------------------------------------------------|
| pRS316-promScCST6-ScCST6 (S266A)                                               | this study                                       |
| pRS316-promScCST6-ScCST6 (S266D)                                               | this study                                       |
| pRS416-promScSCH9-ScSCH9-3HA                                                   | R. Loewith / Urban et al., 2007                  |
| pRS416-promScSCH9-ScSCH9-3HA (T570A)                                           | R. Loewith / Urban et al., 2007                  |
| pGEX-6P-1 ScSCH9-3HA (S711A, T723A, S726A, T737A, S758A, S765A)                | R. Loewith / Urban et al., 2007                  |
| pRS416-promScSCH9-ScSCH9-3HA (S711A, T723A, S726A, T737A, S758A, S765A)        | this study                                       |
| pRS416-promScSCH9-ScSCH9-3HA (T570A, S711A, T723A, S726A, T737A, S758A, S765A) | R. Loewith / Urban et al., 2007                  |
| pBluescript                                                                    | Agilent Technologies                             |
| pMA-T-ScNce103-His                                                             | GeneArt Gene Synthesis, Thermo Fisher Scientific |
| pMK-RQ-ScCst6-His                                                              | GeneArt Gene Synthesis, Thermo Fisher Scientific |
| pMK-RQ-ScSch9-His                                                              | GeneArt Gene Synthesis, Thermo Fisher Scientific |

#### Primer for qRT-PCR

| Name         | Sequence                   |
|--------------|----------------------------|
| ScNCE103 fwd | GATATTGACACCATGTACCATGA    |
| ScNCE103 rev | TGTAAGTGCTAACTGTTTGCA      |
| ScACT1 fwd   | TTCCCAGGTATTGCCGA          |
| ScACT1 rev   | TGTGGTGAACGATAGATGGA       |
| CgNCE103 fwd | CATGAATCTGAGCTGAACCA       |
| CgNCE103 rev | TGATTGCCATAGACCTCTCTTA     |
| CgACT1 fwd   | ATCATTGCTCCACCAGAGA        |
| CgACT1 rev   | TGTGGTGAACAATGGATGG        |
| CaNCE103 fwd | TCCAGTTAGACATATTCGTGCTG    |
| CaNCE103 rev | TGAGGGTTATATTCTTCTTCATCATG |
| CaACT1 fwd   | TCAGACCAGCTGATTTAGGTTTG    |
| CaACT1 rev   | GTGAACAATGGATGGACCAG       |

#### Primer for protein expression (*E. coli*)

| Name                     | Sequence                                                    |
|--------------------------|-------------------------------------------------------------|
| fw ScNce103 Exp p41 Vspl | GCGCAAATTAATATGAGCGCTACCGAATC                               |
| rv ScNce103 Exp p41      | GGTCAAGCTTATCAATGATGGTGATGATGGTGTGTTTGGGGTAACTTTGTGTAAG     |
| rv ScCst6 Exp p41        | GGTCAAGCTTATCAATGATGGTGATGATGGTGTGTTTATCTTTTCAGAATTGGGTAATG |
| fw ScCst6 Exp p41        | GCGCAACATATGTTTACTGGTCAGGAGTATCATTC                         |
| p41-SCH9-fwd             | AAGACAGAGCGAAATTCTATATCG                                    |
| p41-SCH9-rev             | AGTTTGTTCCGGCCGGATCCGT                                      |

#### Primer for protein expression (*S. cerevisiae*)



| Name                                                               | Sequence                                           |
|--------------------------------------------------------------------|----------------------------------------------------|
| 5'-ScGAL1prom-Sac1                                                 | ATGCGAGCTCTTATATTGAATTTTCAAAAATTCTTACTTTTTTTTTGGAT |
| 3'-ScGAL1prom-Pac1                                                 | ACATTTAATTAATATAGTTTTTCTCCTTGACGTTAAAGTATAG        |
| fw ScCst6 in pRS316                                                | TAACTTAATTAATGTTTACTGGTCAGGAGTATC                  |
| rv ScCst6 in pRS316                                                | GAAGTGGCGCGCCTTATTTTATCTTTTCAGAATTGGGTAATG         |
| pRS316 SCH9-Pac1 fwd                                               | TATATTAATTAACATATGATGAATTTTTTACATCAAAATCGTC        |
| pRS316 SCH9-Asc1 rev                                               | AAGTGGCGCGCCAAGCTTATTATCAATG                       |
| 5'pRS316-veri                                                      | CATTCGCCATTCAGGCTGCG                               |
| 3'pRS316-veri                                                      | TCGAGGTGCGACGGTATCGAT                              |
| 5'SCH9 T570 sequ                                                   | ACATTCTACTCGATGCC                                  |
| 3'SCH9 6A sequ                                                     | ATCTGCGAATGGCTGTTG                                 |
|                                                                    |                                                    |
| <b>Primer for site-specific mutagenesis (<i>S. cerevisiae</i>)</b> |                                                    |
| Name                                                               | Sequence                                           |
| 5'SCH9 A570T                                                       | CTTGAAGGATAGAACAACACATTTTGCGGCACCACGG              |
| 3'SCH9 A570T                                                       | CCGTGGTGCCGCAAATGTGTTTGTCTATCCTTCAAG               |
|                                                                    |                                                    |
| <b>Primer for <i>C. glabrata</i> SCH9 deletion</b>                 |                                                    |
| Name                                                               | Sequence                                           |
| 5' NAT1-EcoR1                                                      | TAT CGA ATT CCA TAG CTT CAA AAT GTT TCT            |
| 3' NAT1-Pst1                                                       | CGGGCTGCAGGCAAATTAAGCC                             |
| 5' CgSCH9prom-Kpn1                                                 | TAAG GGTACC AAAAGTTGGAACCTGTAG                     |
| 3' CgSCH9prom-Xho1                                                 | TATA CTCGAG ATAAATGTTTATTGAAGTGTGAAC               |
| 5' CgSCH9term-Sac2                                                 | TGAT CCGCGG ATTTGTCTTTCATTTGGTT                    |
| 3' CgSCH9term-Sac1                                                 | AGCA GAGCTCAAGGTGTTACTAATTCCATATTT                 |
| G1-CgSCH9                                                          | AAGAACTGTTATTGTATATGTTGTCCCTT                      |
| G4-CgSCH9                                                          | CTGCATCTAGACGGAGTTTACTCTT                          |
| I2-CgSCH9                                                          | TATAGCGGGCTTATCATTAAACACCAATA                      |
| X2-NAT1                                                            | CTGTGCTTGGGTGTTTTGAAGTGGTAC                        |
